# Supplementary material for: Status of Birth Outcomes in Clients of the Nurse-Family Partnership
Source: Springer Nature journal article supplement (doi:10.1007/s10995-017-2267-2), 2017-01-19
Supplement: MOESM1 [file 12007964]

Status of Birth Outcomes in Clients of the Nurse-Family Partnership. Supplemental Materials.

*Attrition as a source of influence on the birth outcomes of NFP clients.* Clients who dropped out tended to have higher risk profiles than those who did not. When compared to those in the Birth Cohort, client who dropped out consisted of a higher proportion of Blacks (31.0% vs. 26.7%) and lower proportions of Whites (28.0% vs. 33.0%) and Hispanics (26.3% vs. 29.4%). Program dropouts also consisted of a higher proportion of clients who were teenage (58.9% vs. 56.4%), unemployed (61.2% vs. 57.8%), or very low income (<$6,000 / yr., 31.7% vs. 26.8%), as well as lower proportions of clients who were married (9.1% vs. 13.5%) or had completed high school or the equivalent (47.0% vs. 51.5%). Only cigarette smoking during pregnancy (29.5% vs. 29.8%) was statistically similar between these groups.

Given that the risk profile of the dropout clients was higher than that of the clients who remained active in the program up through the birth of an index child, additional analysis was conducted to estimate the magnitude of this effect. Utilizing the demographic profiles of the clients who dropped out, propensity score matching was conducted to match these mothers with ones from the U.S. Natality database in the same manner as previously described for the NFP birth cohort.

Since the birth outcomes of the dropout clients were unknown, those of the matched reference sample were used as conservative estimates corresponding to the assumption that no program effect took place. Adding these estimated proportions into those of the birth cohort yielded a somewhat higher incidence for the preterm and low birth weight measures among NFP clients. The adjusted incidence proportions were 1.7% for early preterm births, 9.4% for preterm births, 31.4% for early term births, 1.4% for very low birth weight, and 9.6% for low birth weight. Corresponding rates for the reference sample were less affected (2.4% for early preterm births, 12.4% for preterm births, 36.4% for early term births, 1.8% for very low birth weight, and 9.7% for low birth weight) and the statistical significance of the comparisons (p<0.0001 for the first four measures and p=0.23 for the last) remained similar to what was shown in Table 3. Given these results, while it is evident that client attrition was of some influence on the birth outcomes of the NFP cohort, favorable statistically significant differences with a matched sample of reference subjects persisted even after this effect was to some extent taken into account.

*Economic status as a source of influence on the birth outcomes of NFP clients.* Prior to 2011, U.S. Natality data, which are based on the standard birth record form, did not provide descriptors of socioeconomic status. Consequently, to consider this factor, samples constructed from the birth records database would need to be cross-referenced with other data sources, using individual identifiers as linking variables. In this study, we did not have the facility to conduct such cross-referencing on a national scale in order to construct a reference sample to use in matching with NFP clients. However, beginning in 2011, the birth records database included a variable to indicate whether the mother had received WIC funded food support during her pregnancy; a marker that could be used to characterize low-income status. So, as an alternative to explore the magnitude of effect that may have been otherwise unaccounted for, 2011 U.S. Natality data, limited to those first-time mothers (with singleton births) who received WIC food support, were analyzed for incidence rates of birth outcomes, after being propensity score matched on maternal demographic characteristics with those of the NFP cohort. A total of 27,119 of the original 27,195 clients with all demographics and birth outcomes from the NFP cohort had exact matches with subjects in the 2011 U.S. Natality Data (99.7%). Therefore these 27,119 individuals were compared to this matched reference group with respect to birth outcomes. The resultant birth outcomes in this matched comparison (reference) group revealed rates of 2.1% for early preterm births, 11.4% for preterm births, 34.8% for early term births, 1.5% for very low birth weight, and 9.0% for low birth weight, all of which were greater than those shown for the NFP cohort in Table 3. Among these comparisons, the measures for early preterm, preterm, and early term retained statistical significance (p<0.0001). Similar findings also occurred when the outcomes of NFP cohort were adjusted for the effects of dropouts (as described above) and then matched with and compared to the 2011 reference cohort. So, with the combined considerations of the primary matching results, as well as estimates for the impact of client attrition and the influence of socioeconomic status, these results remain consistent with NFP clients demonstrating favorable differences in the three measures of birth outcomes categorizing gestational age at delivery.

*Discussion.* Client attrition represented a source of bias on the incidence rates of birth outcomes that characterized NFP participants. Although analysis of this effect suggested a modest degree of influence, future estimates of NFP-specific outcomes would be improved by access to administrative databases that provided the birth outcomes of such former clients. Similarly, future use of low-income markers (such as WIC support, as is now available) would facilitate more precise matching procedures that would account for economic variation between the NFP cohort and the comparison sample, beyond what was achieved in the present study by a more indirect approach.

| **Table 4. Demographic characteristics of matched NFP and Reference cohort who received WIC support in 2011.** | | | |
| --- | --- | --- | --- |
|  | NFP (n=27,119) | Matched Controls (n=27,119) | p-value |
| Maternal Race  White  Black  Latina  Other | 9,428 (34.77%)  7,603 (28.04%)  8,315 (30.66%)  1,773 (6.54%) | 9,428 (34.77%)  7,603 (28.04%)  8,315 (30.66%)  1,773 (6.54%) | 1.00 |
| Maternal Age  <18 years  18-19 years  20-22 years  23-29 years  30 years or older | 6,823 (25.16%)  7,103 (26.19%)  6,707 (24.73%)  5,120 (18.88%)  1,366 (5.04%) | 6,823 (25.16%)  7,103 (26.19%)  6,707 (24.73%)  5,120 (18.8%)  1,366 (5.04%) | 1.00 |
| Ever Smoked during Pregnancy  Yes  No | 8,099 (29.86%)  19,020 (70.14%) | 8,099 (29.86%)  19,020 (70.14%) | 1.00 |
| High School/Equivalent  Yes  No | 14,009 (51.66%)  13,110 (48.34%) | 14,009 (51.66%)  13,110 (48.34%) | 1.00 |
| Marital Status  Married  Not Married | 3,618 (13.34%)  23,501 (86.66%) | 3,618 (13.34%)  23,501 (86.66%) | 1.00 |

**Table 5. Birth Outcomes of NFP and Matched Reference cohort who received WIC support in 2011.**

|  | **NFP n (%)** | **Control n (%)** | **p-value** |
| --- | --- | --- | --- |
| **Early Preterm Birth**  **Yes**  **No** | 401 (1.48%)  26,715 (98.52%) | 556 (2.05%)  26,560 (97.95%) | <0.0001 |
| **Preterm Birth**  **Yes**  **No** | 2,352 (8.67%)  24,767 (91.33%) | 3,081 (11.36%)  24,038 (88.64%) | <0.0001 |
| **Early Term Birth**  **Yes**  **No** | 8,185 (30.21%)  18,907 (69.79%) | 9,437 (34.83%)  17,655 (65.17%) | <0.0001 |
| **Low Birth Weight**  **Yes**  **No** | 2,556 (9.43%)  24,563 (90.57%) | 2,437 (8.99%)  24,682 (91.01%) | 0.08 |
| **Very Low Birth Weight**  **Yes**  **No** | 357 (1.32%)  26,762 (98.68%) | 406 (1.50%)  26,713 (98.50%) | 0.07 |

*using McNemar’s test
